# Supplementary material for: Synthesis, DNA binding and photocleavage study of novel anthracene-appended macrocyclic polyamines
Source: Royal Society of Chemistry journal article supplement (doi:10.1039/b823416g), 2009-01-01
Supplement: b823416g.pdf [file b823416g.pdf]

**Synthesis, DNA binding and photocleavage study of novel anthracene-appended macrocyclic polyamines**

Yu Huang<sup>a</sup>, Yu Zhang<sup>a</sup>, Ji Zhang<sup>a</sup>, Da-Wei Zhang<sup>b</sup>, Qiao-Sen Lu<sup>a</sup>,  
Jun-Liang Liu<sup>a</sup>, Shan-Yong Chen<sup>a</sup>, Hong-Hui Lin<sup>b\*</sup>, Xiao-Qi Yu<sup>a\*</sup>

*a* Key Laboratory of Green Chemistry and Technology (Ministry of Education), College of Chemistry, Sichuan University, Chengdu, 610064, P. R. China

*b* Key Laboratory of Bio-resources and Eco-environment (Ministry of Education), College of Life Sciences, Sichuan University, Chengdu, Sichuan 610064, China.

**Table of content**

**Figure S1:** Absorption titration of compound **1**. .....S3

**Figure S2:** Fluorescence titration of compound **1**. .....S4

**Figure S3:** Histogram representing the percent photocleavage of pUC 19 plasmid DNA. ....S5

**Figure S4:** <sup>1</sup>H NMR and <sup>13</sup>C NMR of **1**. .....S7

**Figure S5:** <sup>1</sup>H NMR and <sup>13</sup>C NMR of **2**. ..... S8

**Figure S6:** <sup>1</sup>H NMR and <sup>13</sup>C NMR of **3**. ..... S9

**Figure S7:** <sup>1</sup>H NMR and <sup>13</sup>C NMR of **4**. .....S10

**Figure S8:** <sup>1</sup>H NMR and <sup>13</sup>C NMR of **5**. .....S11

**Figure S9:** <sup>1</sup>H NMR and <sup>13</sup>C NMR of **6**. .....S12

*Supporting information*

---

**Figure S10:**  $^1\text{H}$  NMR and  $^{13}\text{C}$  NMR of **7**. .....S13

**Figure S11:**  $^1\text{H}$  NMR and  $^{13}\text{C}$  NMR of **8**. .....S14

**Figure S12:**  $^1\text{H}$  NMR and  $^{13}\text{C}$  NMR of **9**. .....S15

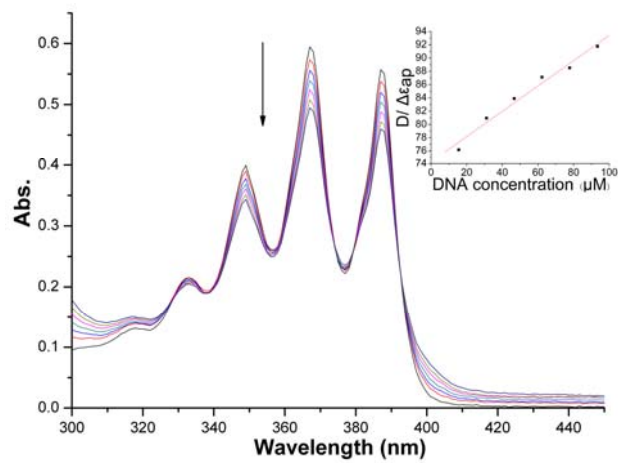

Figure S1. Absorption spectra of **1** (100 μM) with increasing concentrations of CT DNA (0-100 μM)

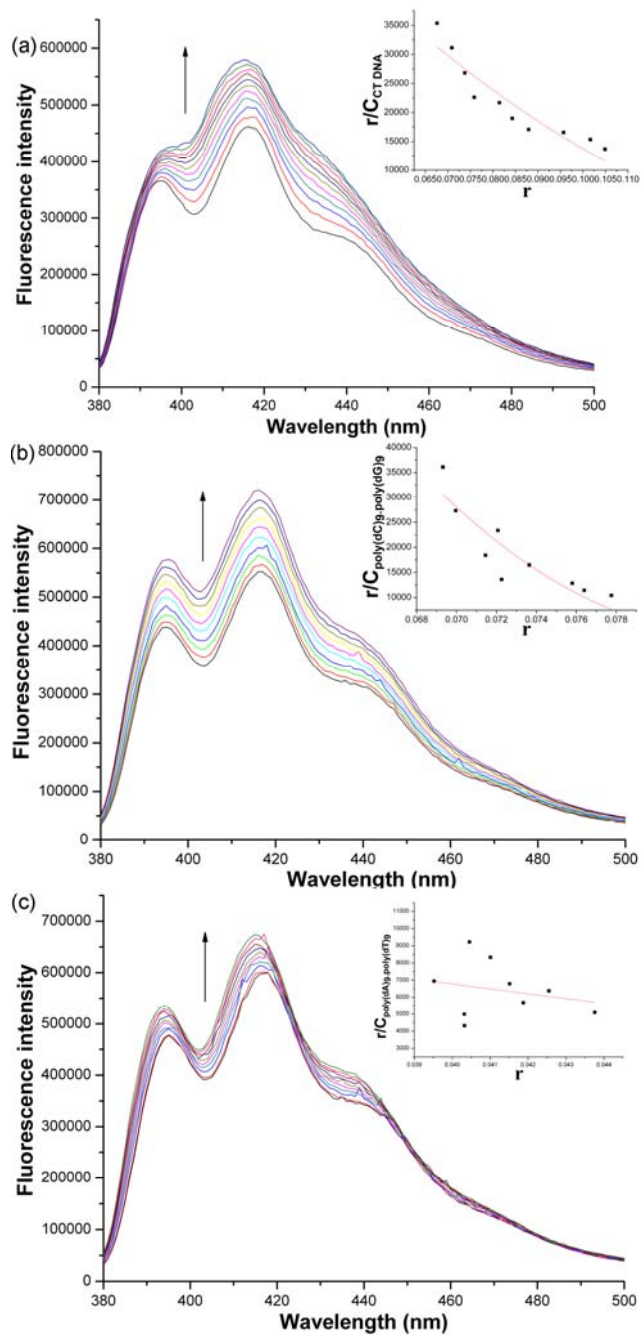

Figure S2. Fluorescence titration of compound 1 with (a) CT DNA, (b) poly (dC-dG)<sub>9</sub> and (c) poly (dA-dT)<sub>9</sub>.

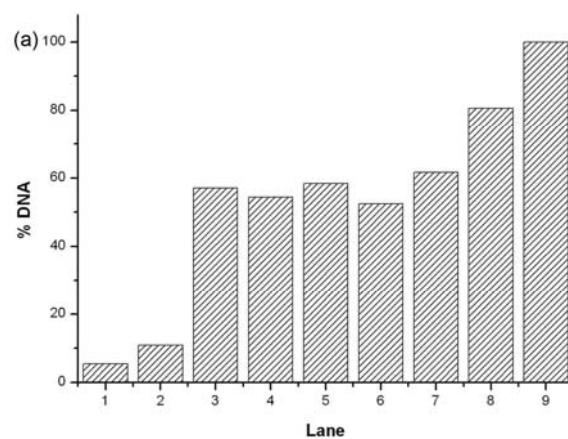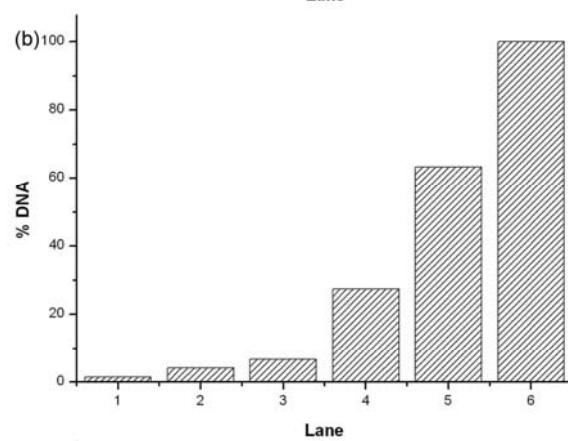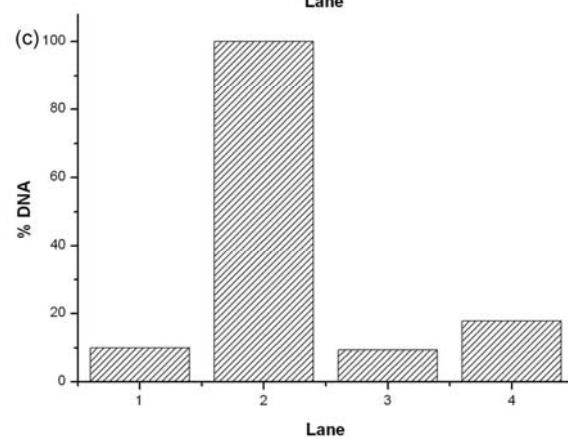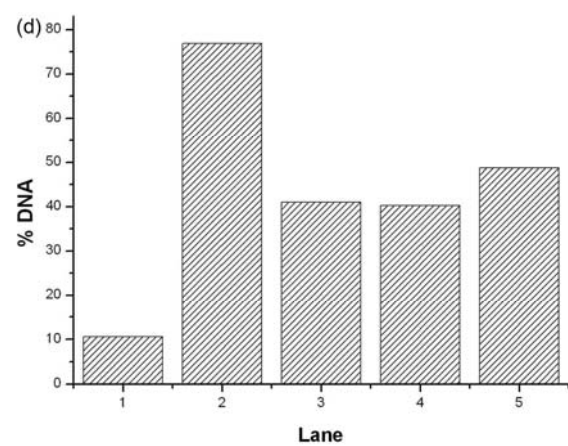

## ***Supporting information***

---

Figure S3. Histogram representing the percent photocleavage of pUC 19 plasmid DNA. (a) Different irradiation time in the presence of compound **2**; (b) Different concentration of compound **2**; (c) Comparing the photocleavage activity of compound **2** and **1**; (d) Inhibition experiments in the presence of compound **2**.

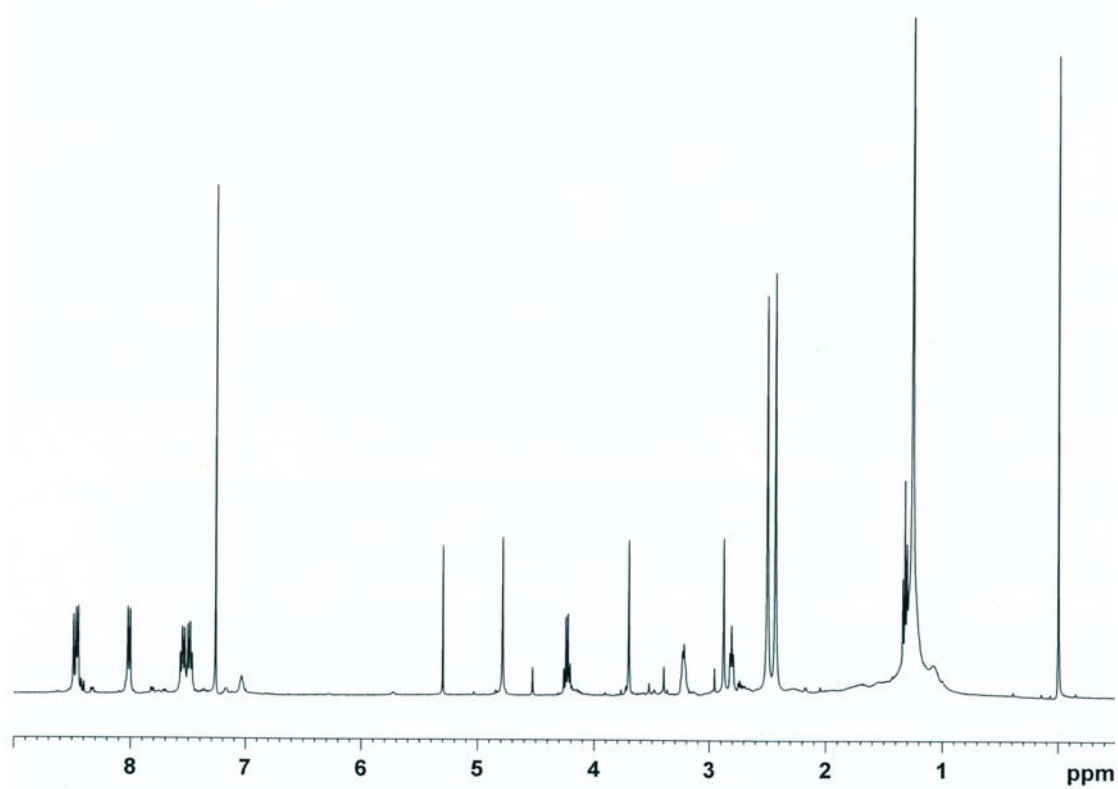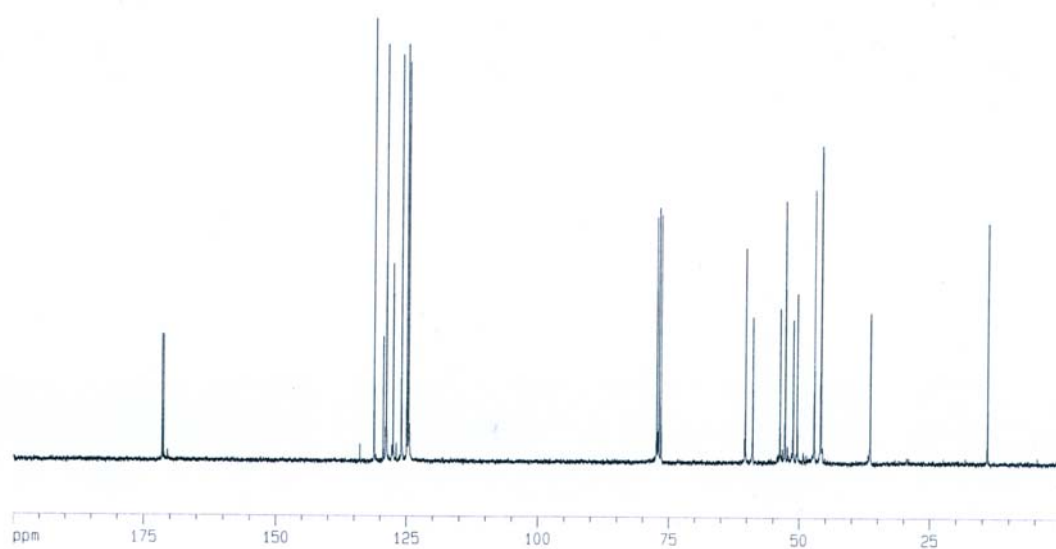

Figure S4:  $^1\text{H}$  NMR and  $^{13}\text{C}$  NMR of **1**.

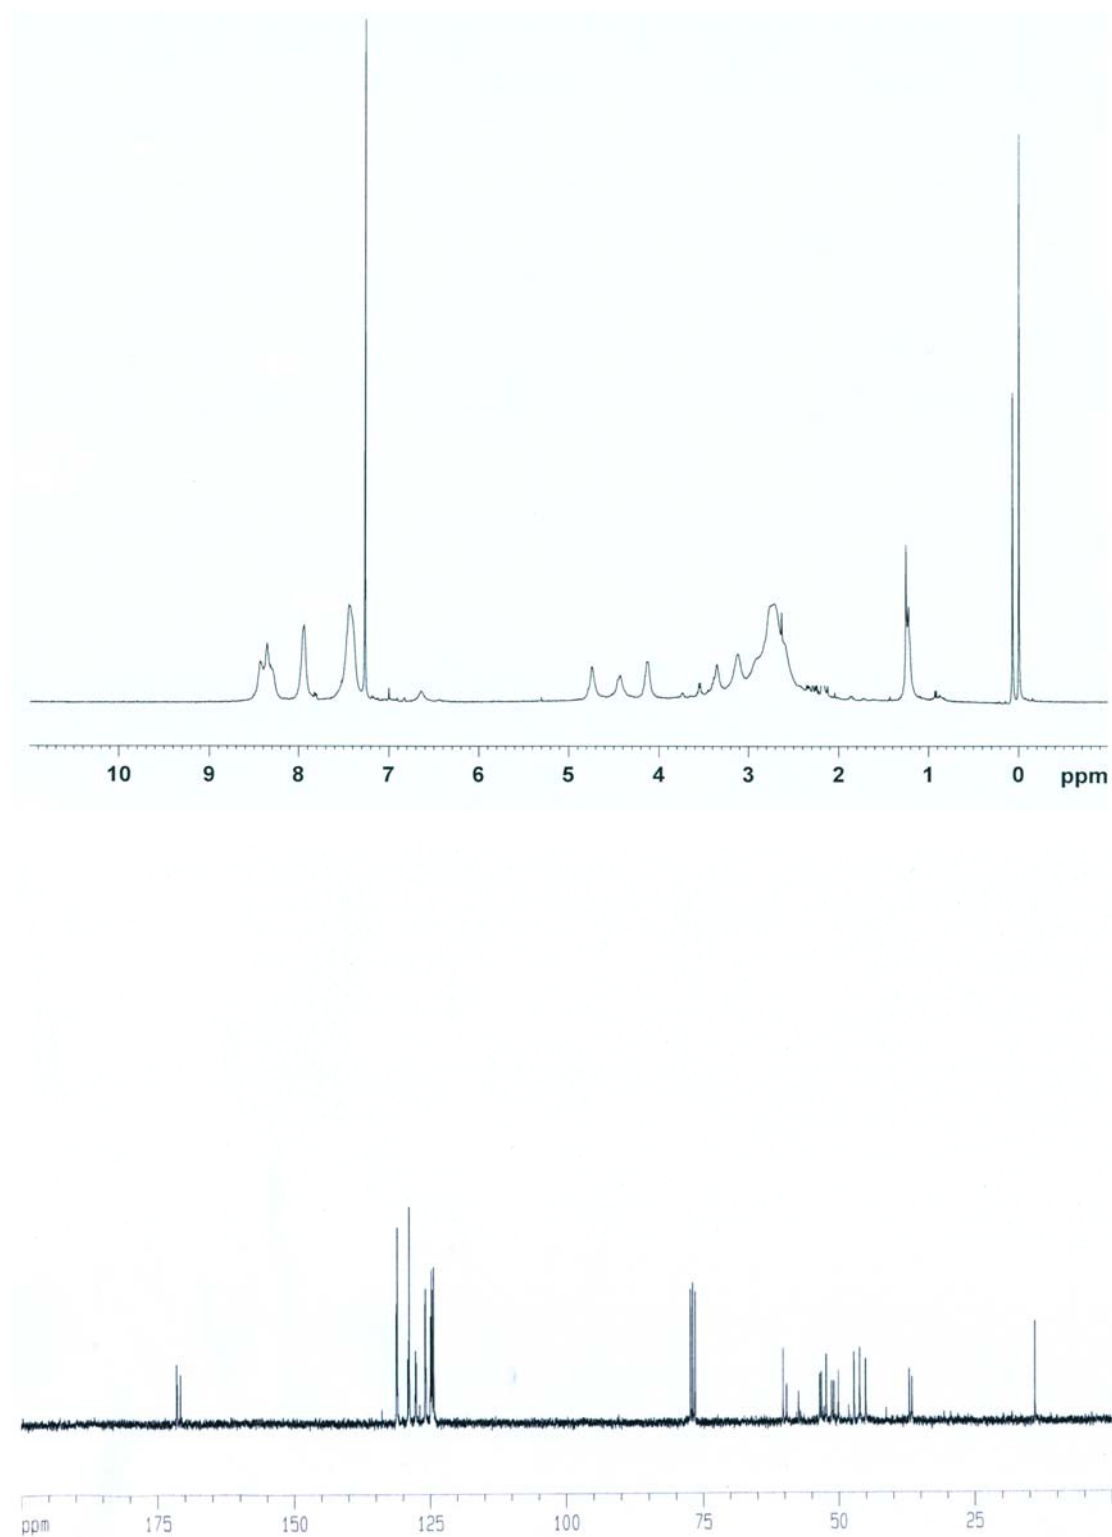

Figure S5:  $^1\text{H}$  NMR and  $^{13}\text{C}$  NMR of **2**.



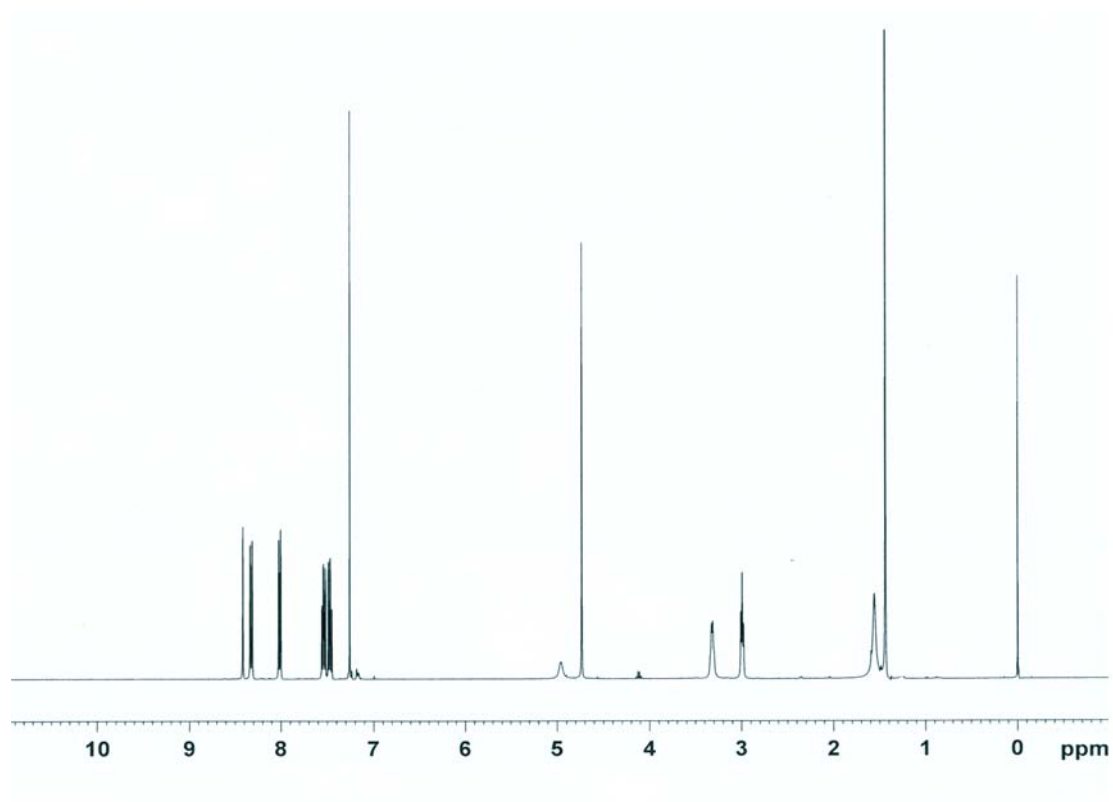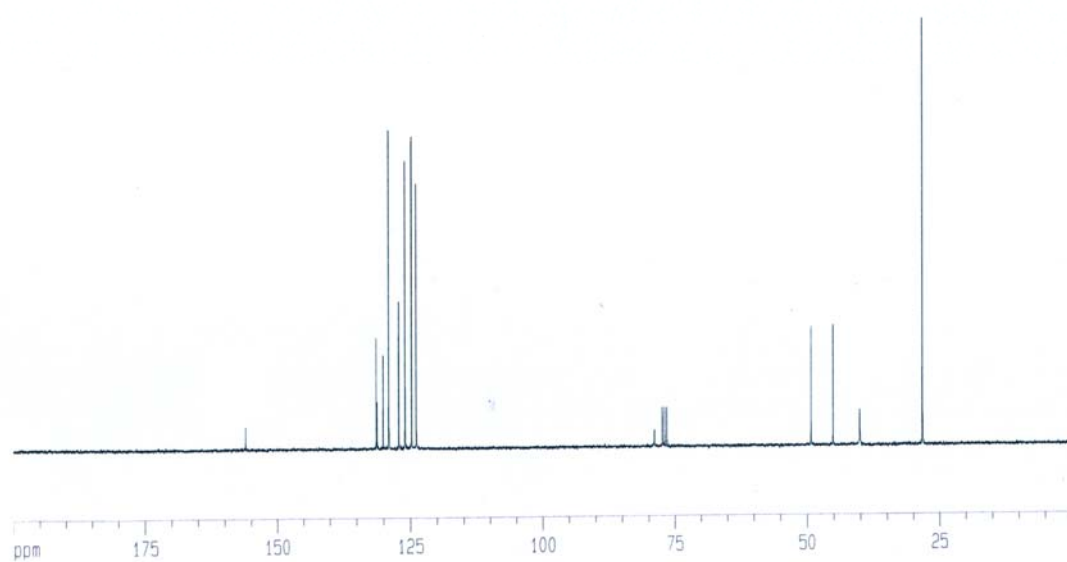

Figure S6:  $^1\text{H}$  NMR and  $^{13}\text{C}$  NMR of **3**.

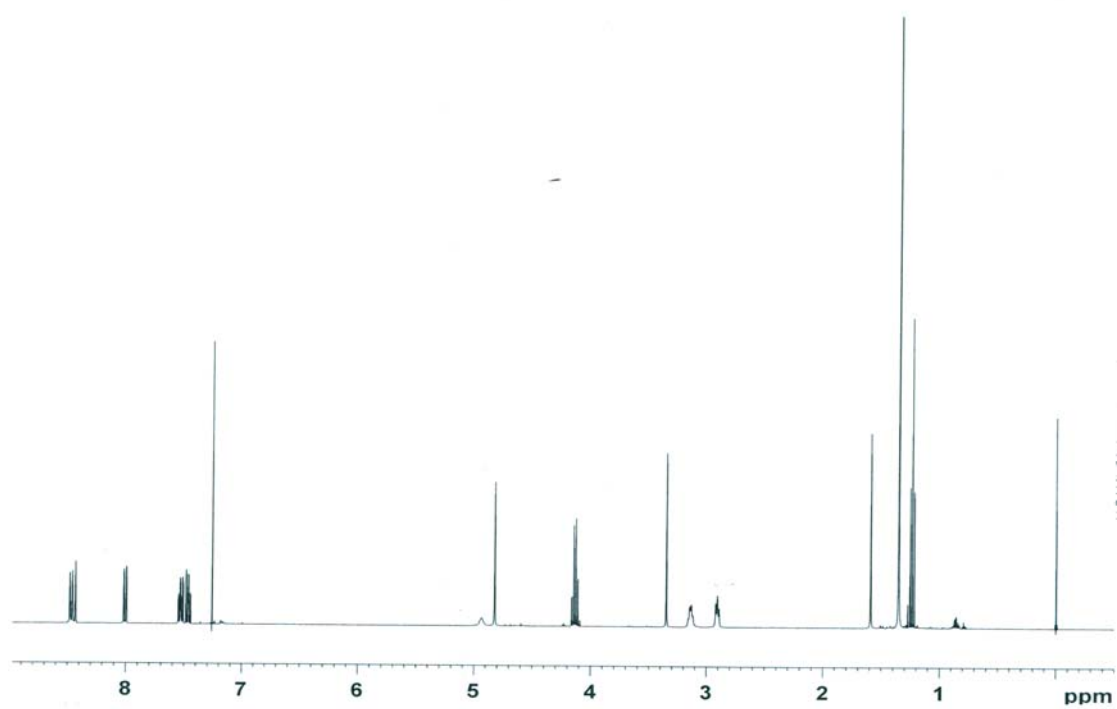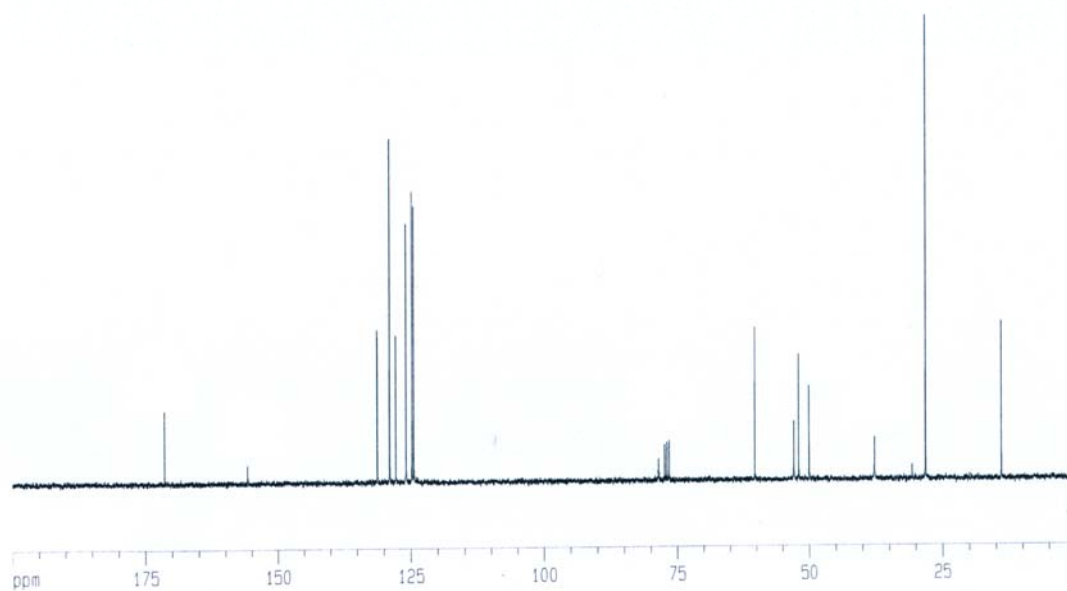

Figure S7:  $^1\text{H}$  NMR and  $^{13}\text{C}$  NMR of **4**.

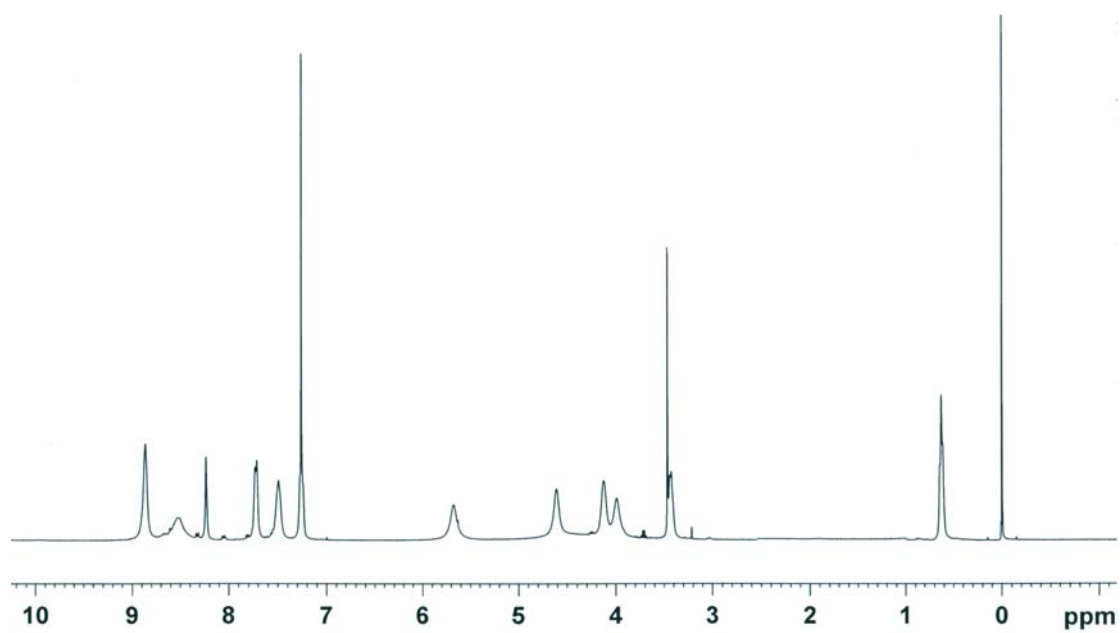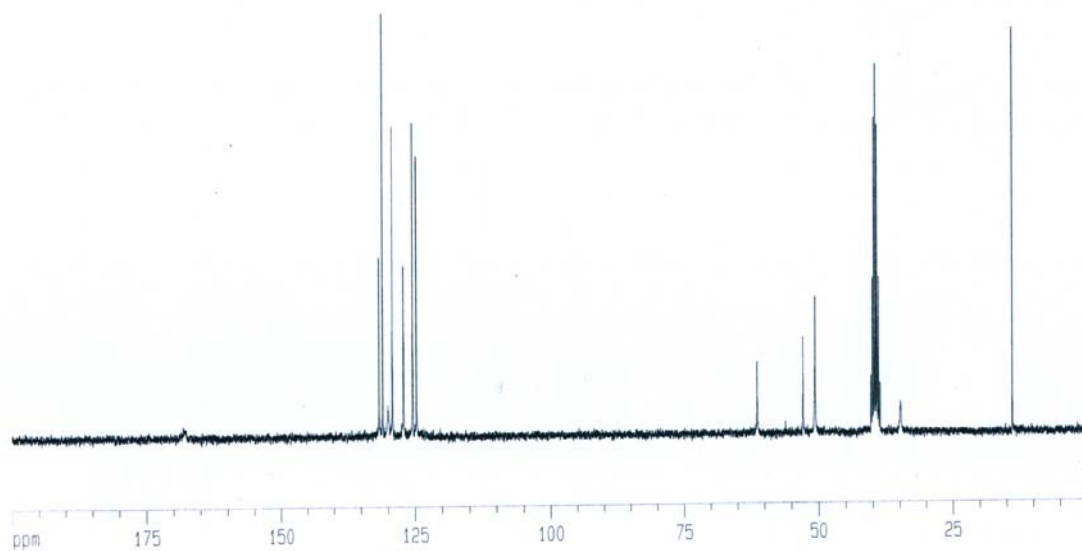

Figure S8:  $^1\text{H}$  NMR and  $^{13}\text{C}$  NMR of **5**.

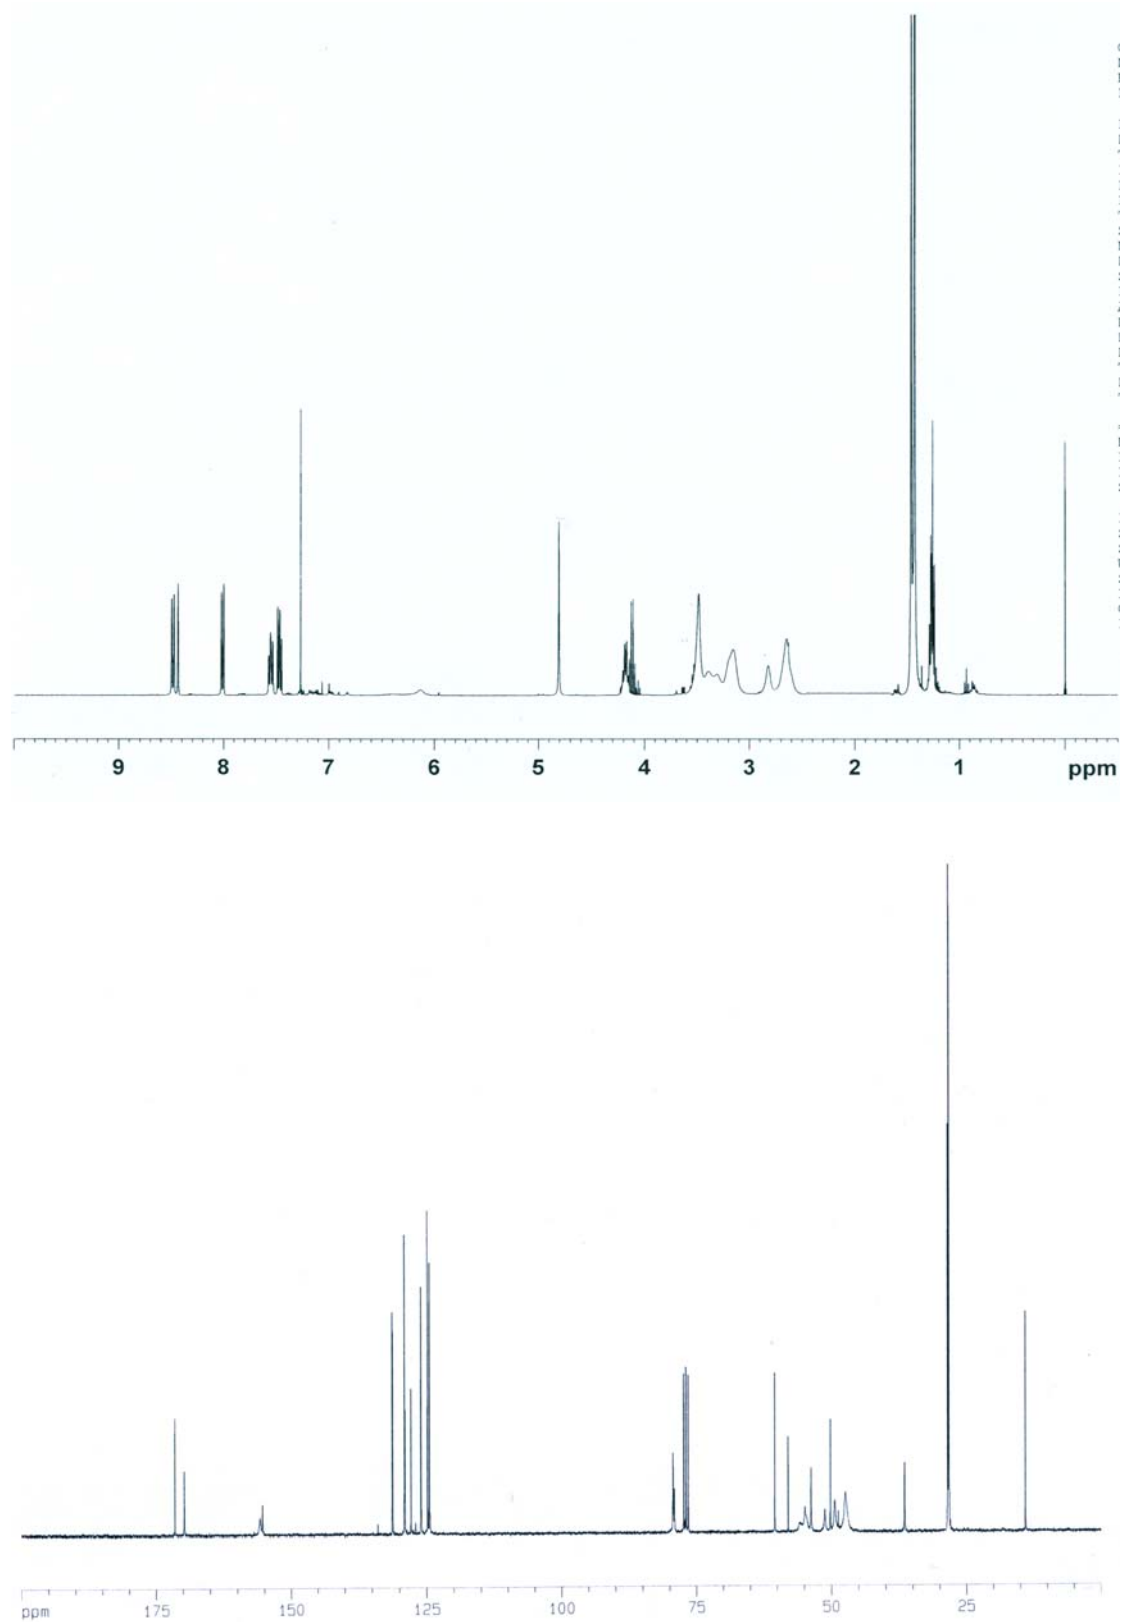

Figure S9:  $^1\text{H}$  NMR and  $^{13}\text{C}$  NMR of **6**.

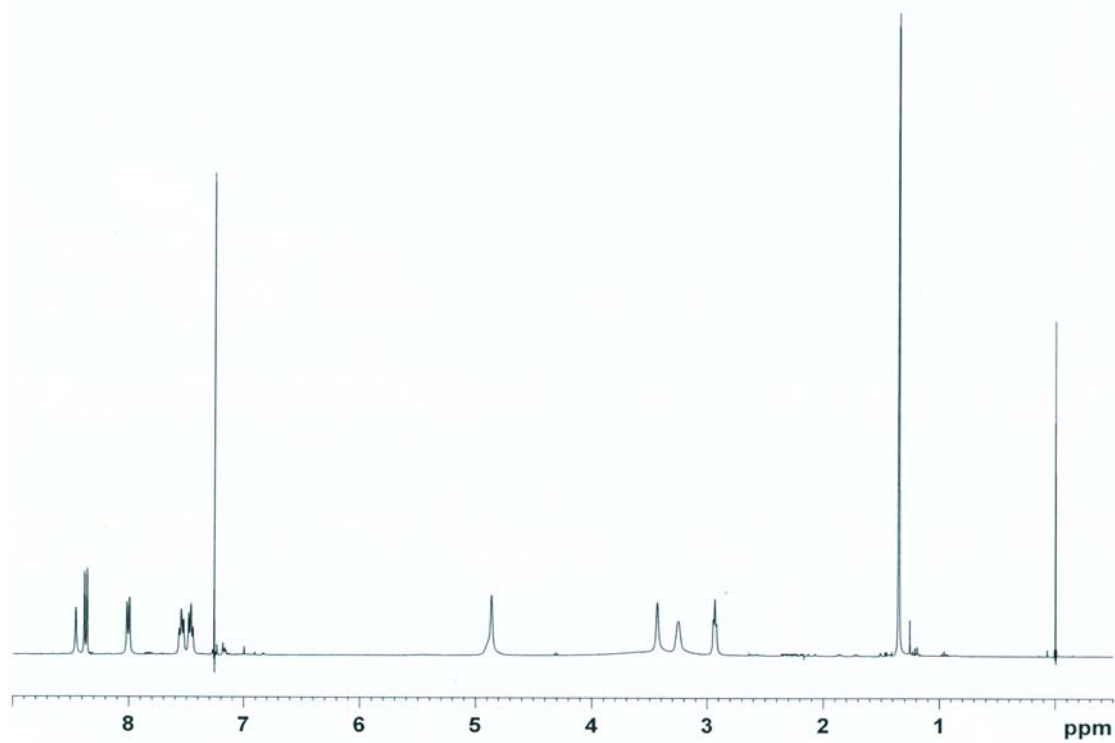

Figure S10:  $^1\text{H}$  NMR NMR of 7.

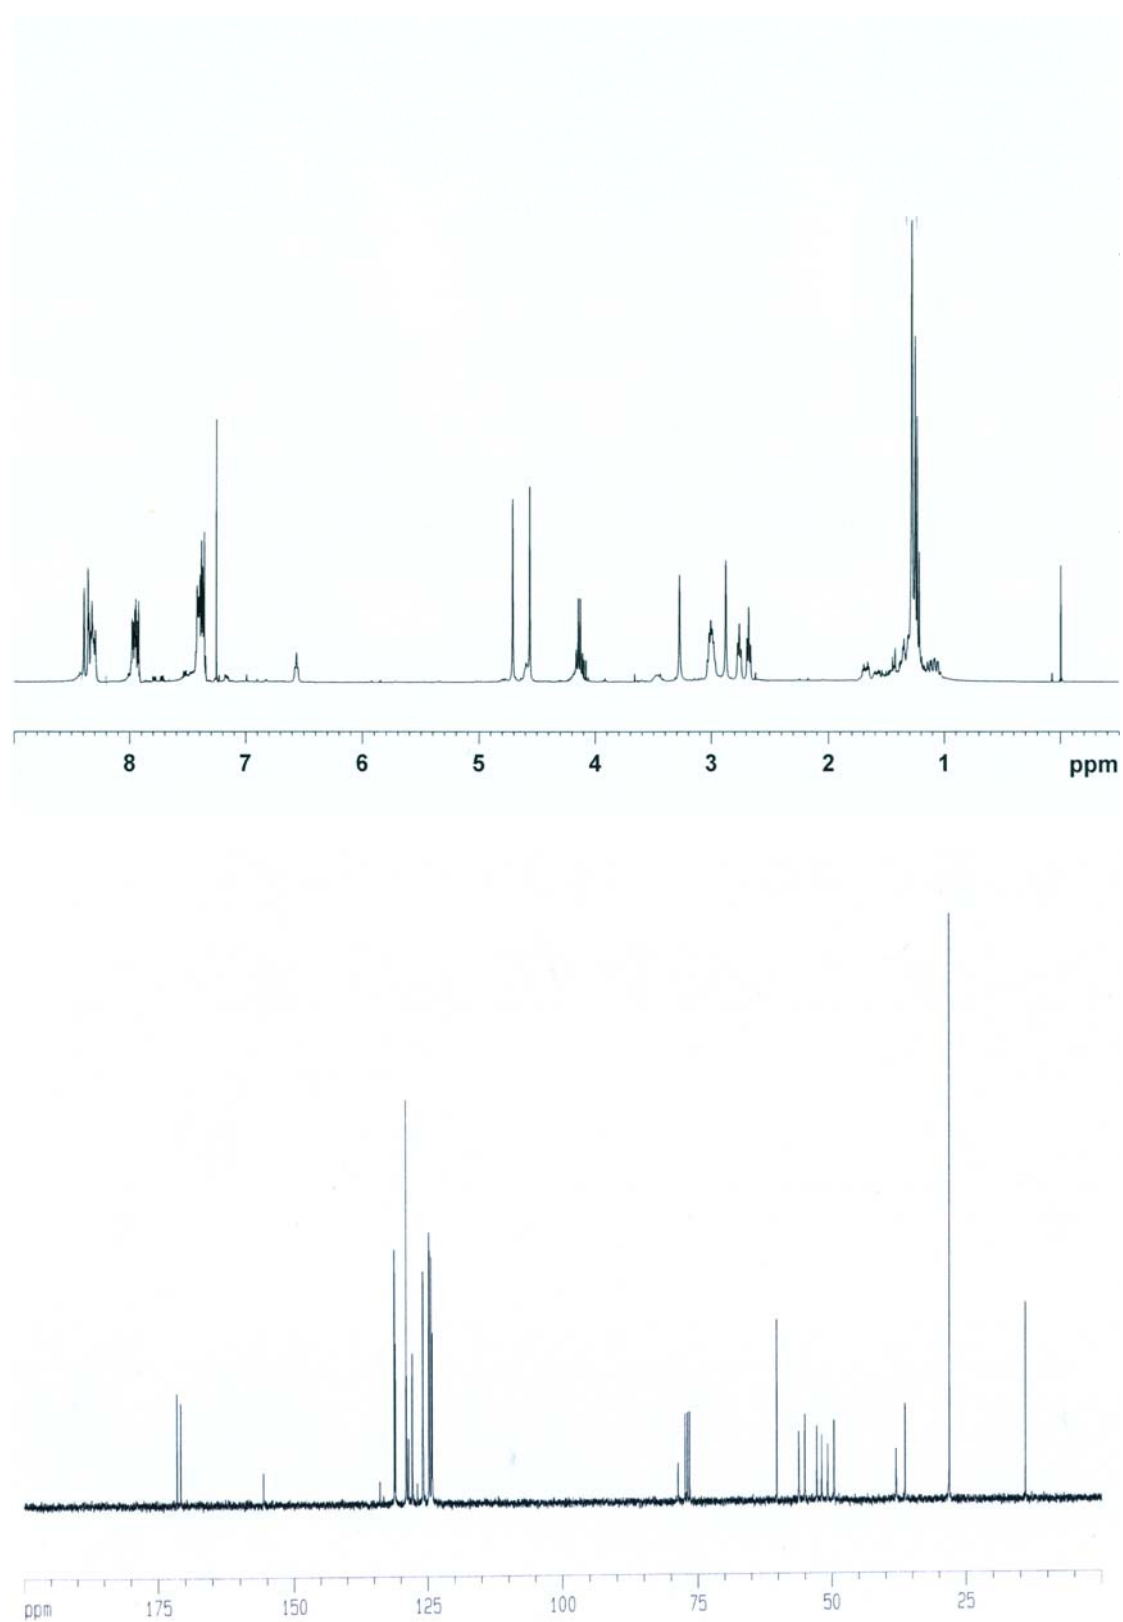

Figure S11:  $^1\text{H}$  NMR and  $^{13}\text{C}$  NMR of **8**.

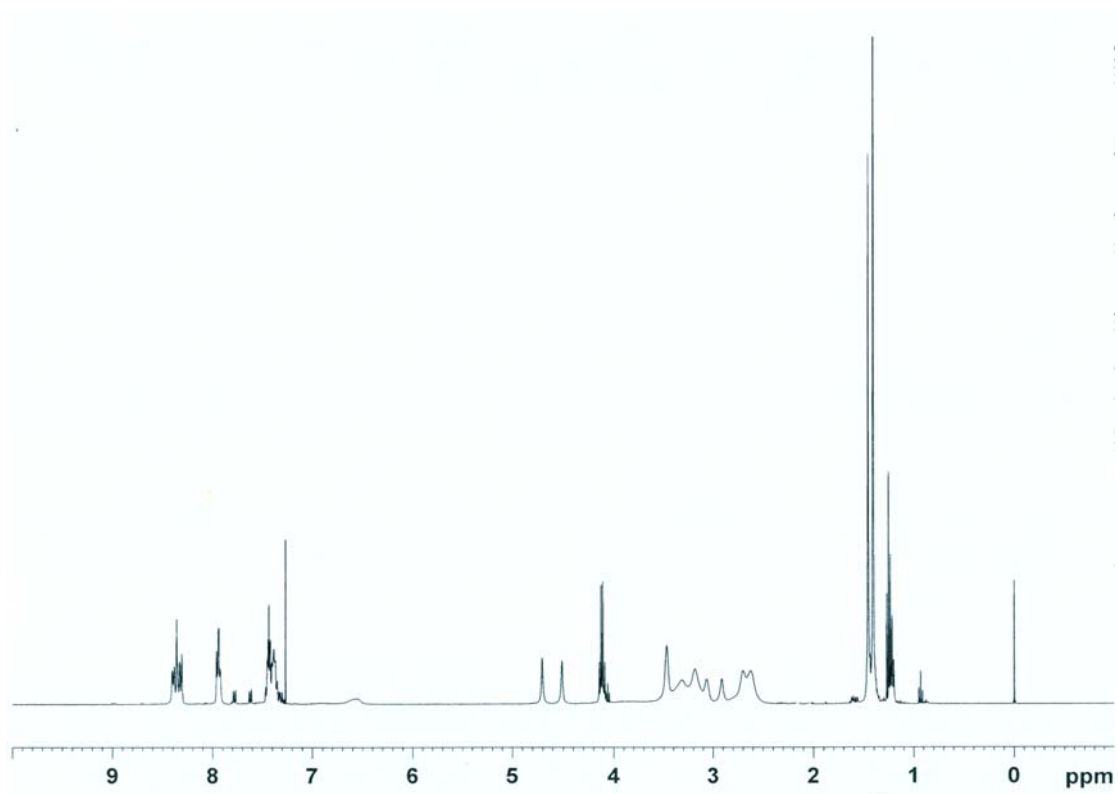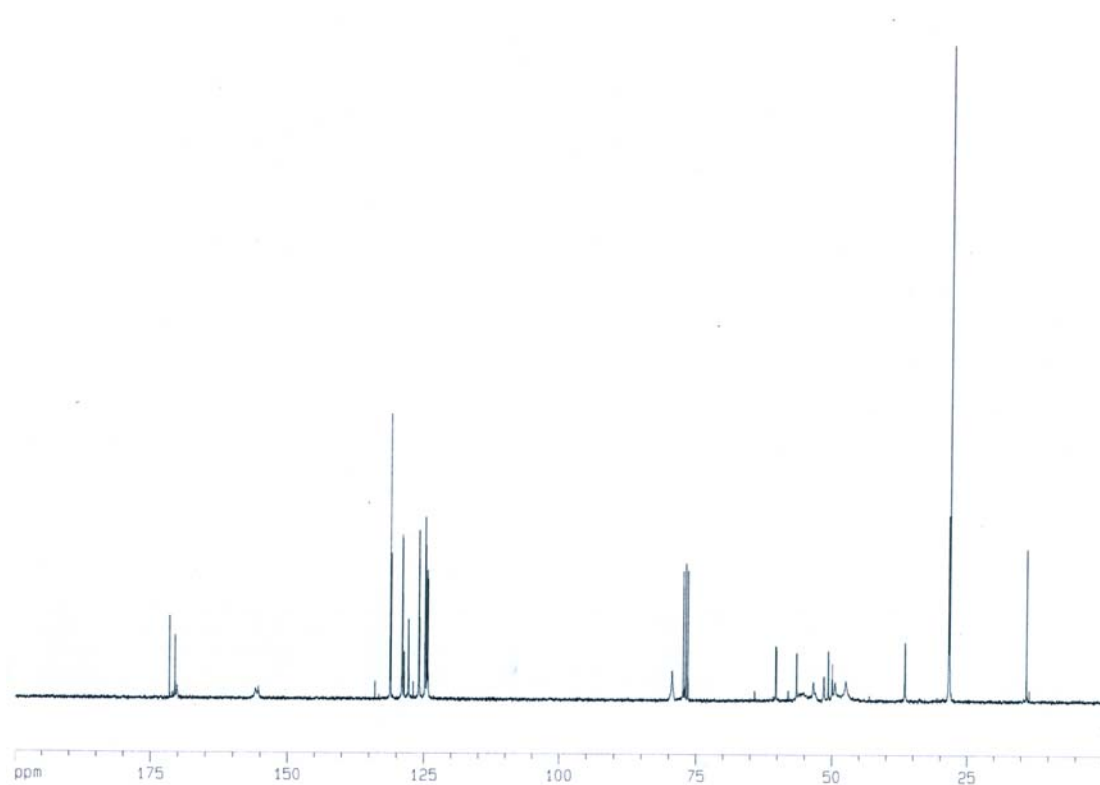

Figure S12:  $^1\text{H}$  NMR and  $^{13}\text{C}$  NMR of **9**.
